# Supplementary material for: Membrane Bound CRT Fragment Accelerates Tumor Growth of Melanoma B16 Cell In Vivo through Promoting M2 Polarization via TLR4
Source: J Immunol Res. 2022 Oct 6;2022:4626813. doi: 10.1155/2022/4626813 (PMC9560857; doi:10.1155/2022/4626813)
Supplement: Supplementary Materials — Supplementary Figure S1: proportions of MDSC/NK/DC/CD4+ T/CD8+ T cells remained comparable between B16-EGFP and B16-tmCRT/39-272 groups. Single cells were collected from tumor tissues of tumor bearing mice 18 days postinoculation, and stained with antibodies against CD45, Gr-1, CD11b, CD3, NK1.1, CD11c, CD4, or CD8 (in different combinations). The proportions of (a) MDSC (Gr-1 + CD11b+), (c) NK (CD3 + NK1.1+), (C) DC (CD11b + CD11c+), (d) CD4+ T (CD3 + CD4+), and (e) CD8+ T (CD3 + CD8+) were analyzed by FACS. [file 4626813.f1.docx]

**Figure S1:**


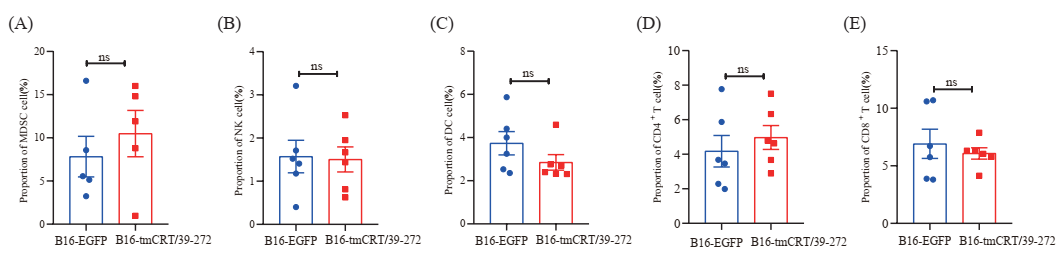


**Figure S1:** Proportions of MDSC/NK/DC/CD4+ T/CD8+ T cells remained comparable between B16-EGFP and B16-tmCRT/39-272 groups. Single cells were collected from tumor tissues of tumor bearing mice 18 days postinoculation, and stained with antibodies against CD45, Gr-1, CD11b, CD3, NK1.1, CD11c, CD4, or CD8 (in different combinations). The proportions of (a)MDSC (Gr-1+CD11b+), (b) NK (CD3+NK1.1+), (c)DC (CD11b+CD11c+), (d)CD4+ T (CD3+CD4+), and (e) CD8+ T (CD3+CD8+) were analyzed by FACS.
